# Supplementary material
Source: MDPI journal article supplement (https://www.mdpi.com/1424-2818/14/11/918)
Supplement: s1 [file s1]

Archive with 1 entries (1 files):
- diversity-1959234-supplementary.pdf
